# Supplementary material for: Photo-induced self-catalysis of nano-Bi2MoO6 for solar energy harvesting and charge storage
Source: Royal Society of Chemistry journal article supplement (doi:10.1039/d0ra07020c), 2020-01-01
Supplement: d0ra07020c1.pdf [file d0ra07020c1.pdf]

## Supplementary Information

# Photo-induced self-catalysis of nano- $\text{Bi}_2\text{MoO}_6$ for solar energy harvesting and charge storage

Jiangju Si,<sup>a,b</sup> Changmeng Guo,<sup>a</sup> Haojie Liu,<sup>a</sup> Weiwei Li,<sup>a,b</sup> Xiaowei, Guo,<sup>a,b</sup> Peidong

Bai,<sup>a</sup> Yanghong, Liu,<sup>a</sup> Gairong Chen,<sup>a,b\*</sup> and Ningbo Sun<sup>a,b\*</sup>

### Synthesis of nano $\text{Bi}_2\text{MoO}_6$

Powder samples of  $\text{Bi}_2\text{MoO}_6$  were prepared by simple hydrothermal reaction. The precursors,  $\text{Na}_2\text{MoO}_4 \cdot 2\text{H}_2\text{O}$  (2 mmol) and  $\text{Bi}(\text{NO}_3)_3 \cdot 5\text{H}_2\text{O}$  (2 mmol), were added into 20 ml of 2.0 M nitric acid with stirring, and the pH value of the solution was then adjusted to 2.0 by the addition of an ammonia solution. After being stirred for 2 h at room temperature, the mixed solution was transferred into a 50 ml Teflon-lined autoclave and kept at 453 K for 24 h. After cooling the solution to room temperature, the precipitates were separated by centrifuging, rinsed three times alternately with deionized water and ethanol, and then dried at 333 K for 24 h in a vacuum.

### The preparation of the working electrodes

The active material, nano  $\text{Bi}_2\text{MoO}_6$  powder, was mixed with conductive carbon black (Super P), and polyvinylidene fluoride binder (PVDF) solution (PVDF in N-methyl-2-pyrrolidinone (NMP)) at a weight ratio of 6:3:1 to form a slurry by stirring. Then the working electrodes were prepared by spreading the slurry on a hydrophilic carbon paper

using a doctor blade and then drying in vacuum at 80 °C for 24 h to remove the NMP.

The mass loading density of Bi<sub>2</sub>MoO<sub>6</sub> is uniform and is approximately 0.45 mg cm<sup>-2</sup>.

### **The electrochemical and photoelectrochemical tests**

The electrochemical processes of the Bi<sub>2</sub>MoO<sub>6</sub> electrodes were measured using a standard three-electrode system, which contained the working electrode of Bi<sub>2</sub>MoO<sub>6</sub>, the platinum counter electrode, and the Hg/HgO reference electrode in a 1 M KOH electrolyte at room temperature and atmospheric pressure. Cyclic voltammetry (CV), galvanostatic charge-discharge (GCD), and electrochemical impedance spectroscopy (EIS 10 mHz to 100 kHz at voltage amplitude of 10 mV) tests were both performed on an IviumStat electrochemical workstation. The experimental measurements of the irradiation of visible light were carried out in a 100 ml quartz electrochemical cell. A 300 W Xenon arc lamp was utilized as a visible-light source. The focused intensity on the cell was ca. 8 mWcm<sup>-2</sup>. In the sacrificial agent experiments, 0.01 M of triethanolamine (TEA) was added to the electrolyte as the hole sacrificial agent.

### **Materials characterization:**

Rigaku-Ultima III X-ray diffractometer with CuK $\alpha$  radiation ( $\lambda = 1.5418 \text{ \AA}$ ) was used to determine the phase formation of the as prepared materials. The surface morphological features of as-prepared samples were studied by using FE-SEM and TEM. The elemental detection was done by using energy-dispersive X-ray spectroscopy (EDS) analyzer.

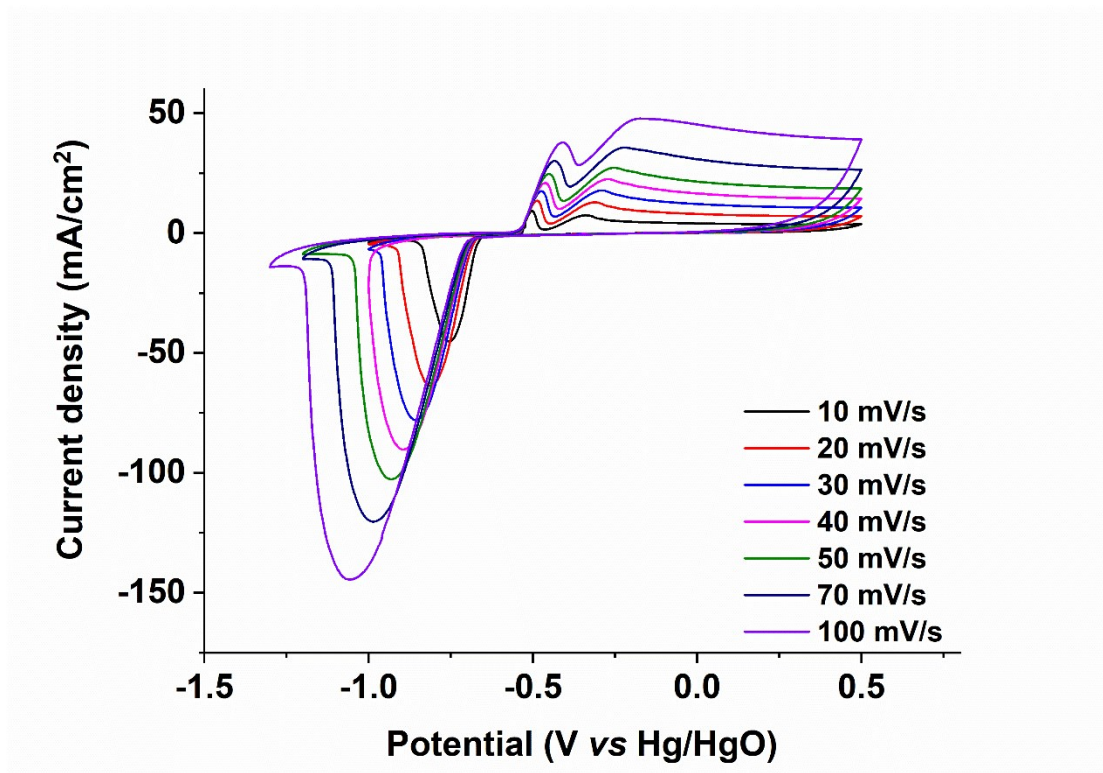

**Figure S1.** The CV curves of the  $\text{Bi}_2\text{MoO}_6$  electrode at different scan rates in the dark

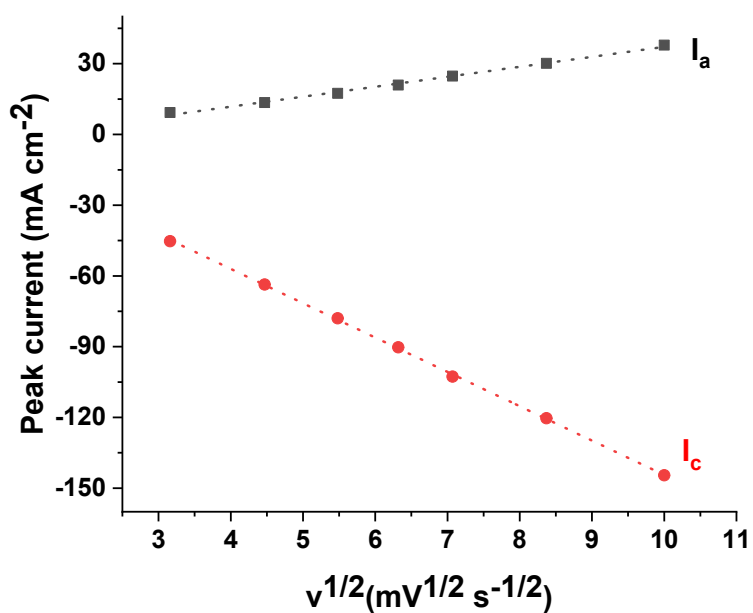

**Figure S2.** The relationship between the peak current and the sweep rate of the  $\text{Bi}_2\text{MoO}_6$  electrodes (the currents of the anode and cathode were abbreviated as  $I_a$  and  $I_c$ , respectively).

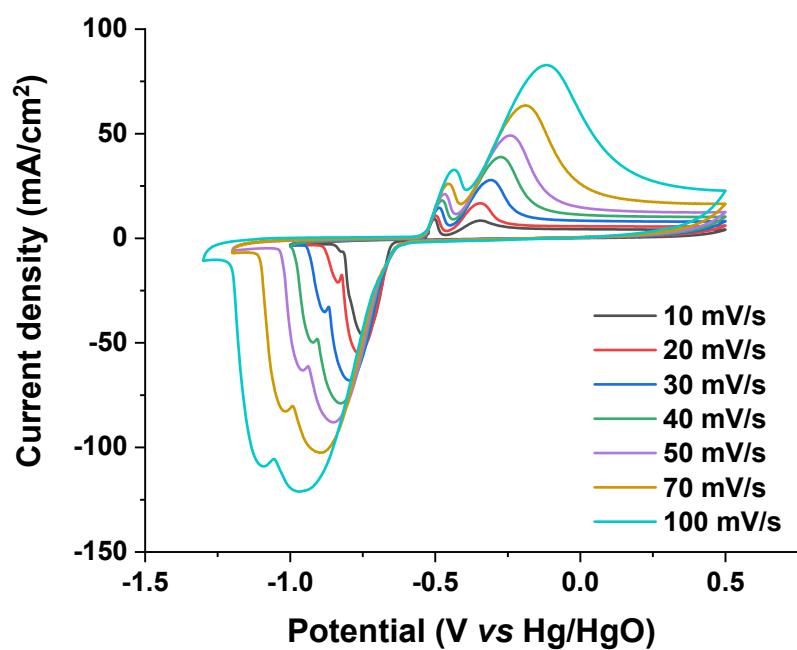

**Figure S3.** the CV curves of the  $\text{Bi}_2\text{MoO}_6$  electrode at different scan rates the irradiation of visible light

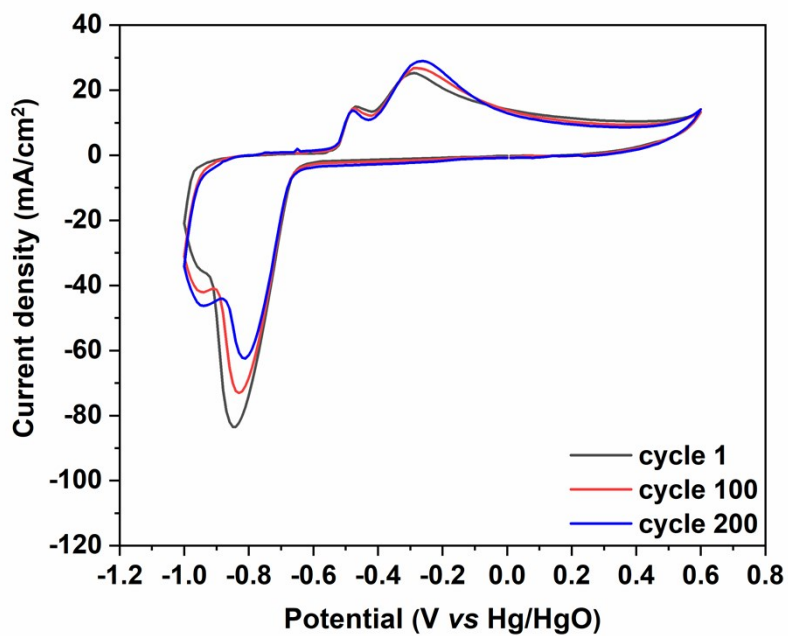

**Figure S4.** The CV curves of the  $\text{Bi}_2\text{MoO}_6$  electrode cycling at a scan rate of  $50 \text{ mV s}^{-1}$  under the irradiation of visible light

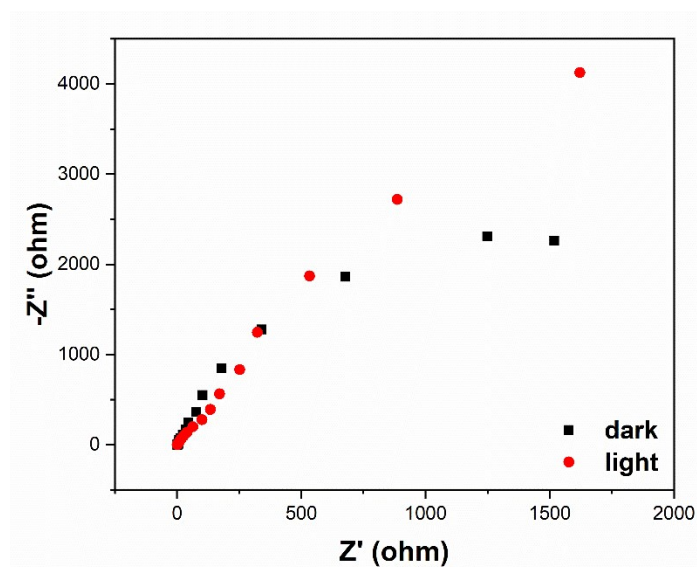

**Figure S5** The Nyquist plots of the  $\text{Bi}_2\text{MoO}_6$  electrode in the dark and under the irradiation of visible light

**Table S1** The cycling stability comparison of  $\text{Bi}_2\text{MoO}_6$ -based electrode for supercapacitor application

| $\text{Bi}_2\text{MoO}_6$ -based electrode           | Capacitance retention | Cycling number | Current Scanning rate   | density/ | Reference                             |
|------------------------------------------------------|-----------------------|----------------|-------------------------|----------|---------------------------------------|
| BMO/TNT-3                                            | 76.7 %                | 1000           | 1 mA $\text{cm}^{-2}$   |          | RSC Adv., 2019, 9, 4693               |
| $\text{Bi}_2\text{MoO}_6$ nanoplates                 | 66.7 %                | 200            | 10 mA $\text{cm}^{-2}$  |          | Solid State Sci., 2014, 35, 18.       |
| $\text{Bi}_2\text{MoO}_6$ nanowires                  | 84.7 %                | 1000           | 10 mV $\text{s}^{-1}$   |          | J. Electrochem. Soc., 2012, 159, D582 |
| $\text{Bi}_{3.6}\text{Mo}_{0.36}\text{O}_{6.55}$ NPs | 35 %                  | 100            | 2 A $\text{g}^{-1}$     |          | J. Solid State Electr., 2016, 21, 403 |
| $\text{Bi}_2\text{MoO}_6$ nanosheets                 | 69.5%                 | 1000           | 0.585 A $\text{g}^{-1}$ |          | J. Power Sources, 2016, 331, 481      |
| Hierarchical $\text{Bi}_2\text{MoO}_6$               | 92.4%                 | 1000           | 0.585 A $\text{g}^{-1}$ |          | J. Power Sources,                     |

|                                                                       |              |            |                             |                  |                              |
|-----------------------------------------------------------------------|--------------|------------|-----------------------------|------------------|------------------------------|
| nanotubes                                                             |              |            |                             |                  | 2016, 331, 481               |
| Hierarchical Bi <sub>2</sub> MoO <sub>6</sub>                         | 95%          | 400        | 3 A g <sup>-1</sup>         |                  | ACS Sustain.                 |
| hollow microspheres                                                   |              |            |                             |                  | Chem. Eng., 2018,<br>6, 7355 |
| <b>Bi<sub>2</sub>MoO<sub>6</sub> illuminated<br/>by visible light</b> | <b>92.5%</b> | <b>200</b> | <b>50 mV s<sup>-1</sup></b> | <b>This work</b> |                              |

---
